# Supplementary material
Source: MDPI journal article supplement (https://www.mdpi.com/2071-1050/11/18/5063)
Supplement: s1 [file s1]

## Supplementary file 1 – MHRI

Multi-hazard risk assessment at community level integrating local and scientific knowledge in the Hodh Chargui, Mauritania

Maurizio Tiepolo, Maurizio Bacci, Sarah Braccio, Stefano Bechis

*Sustainability* - Open Access Journal MDPI

Acronyms : MD-Meteorological drought, HD-Hydrological drought, AD-Agricultural drought, HR-Heavy rainfall, TLU-Tropical Livestock unit, MHRI-Multi-hazard risk index

White boxes mean that the indicator is not measured for the cell in question.

Columns 3-13, 16-38, 41-50 present the normalized real values on a scale of 0-1.

Columns 14, 39 and 51 show the sum of the values of each indicator relative to the exposure, vulnerability and adaptive capacity normalized respectively on a 0-1 scale by assigning 1 to the maximum value observed in the "Sum" column (e.g.: Agoueininit Exposure MD = 2.71 = 1. Consequently, Bégou = 0.48 / 2.71 = 0.18).

| Community          | Hazard |                           | Exposure        |                         |                   |       |           |            |                |               |            |                           |                           |      |            |               |            | Vulnerability      |                                  |                    |                     |                         |               |                                |             |                |                      |                          |                            |                 |                    |          |                           |                      |                 |                   |                               | Adaptive capacity |      |            |                                 |                            |              |                         |           |          |                      |                    |                     | Risk     |       |            |                     |                        |
|--------------------|--------|---------------------------|-----------------|-------------------------|-------------------|-------|-----------|------------|----------------|---------------|------------|---------------------------|---------------------------|------|------------|---------------|------------|--------------------|----------------------------------|--------------------|---------------------|-------------------------|---------------|--------------------------------|-------------|----------------|----------------------|--------------------------|----------------------------|-----------------|--------------------|----------|---------------------------|----------------------|-----------------|-------------------|-------------------------------|-------------------|------|------------|---------------------------------|----------------------------|--------------|-------------------------|-----------|----------|----------------------|--------------------|---------------------|----------|-------|------------|---------------------|------------------------|
|                    | 1      | 2                         | 3               | 4                       | 5                 | 6     | 7         | 8          | 9              | 10            | 11         | 12                        | 13                        | 14   | 15         | 16            | 17         | 18                 | 19                               | 20                 | 21                  | 22                      | 23            | 24                             | 25          | 26             | 27                   | 28                       | 29                         | 30              | 31                 | 32       | 33                        | 34                   | 35              | 36                | 37                            | 38                | 39   | 40         | 41                              | 42                         | 43           | 44                      | 45        | 46       | 47                   | 48                 | 49                  | 50       | 51    | 52         | 53                  | 54                     |
|                    | Hazard | Probability of occurrence | Irrigated crops | Resident TLU/Population | Population x well | Ponds | Earth dam | Population | Bare land rate | Fenced fields | Embankment | House in flood prone area | Wells in flood prone area | Sum  | Normalized | Mobile signal | Mobile use | Embankment missing | Embankment without spillway/lock | Embankment leaking | Embankment unfenced | Creek banks unprotected | Wells flooded | Pasture distance in dry season | Electricity | Wells distance | Boreholes incomplete | Diesel water pump broken | Fountain irregular service | Well water flow | Well water quality | P growth | Well access for gardening | Absence of gardening | Market distance | Gardening Fencing | Cropping for self-consumption | Road interruption | Sum  | Normalized | Herders, farmers radio programs | Extension herders services | Fodder stock | Extension agri services | Fountains | Borehole | Well with solar pump | Farmer association | Farmer radio access | Spillway | Sum   | Normalized | Risk = H x (E+V-AC) | MHR= MD+HD+AD+HR risks |
| Agoueinit          | MD     | 0.37                      | 1               | 0.9                     | 0.84              |       |           |            |                |               |            |                           |                           | 2.71 | 1.00       |               |            |                    |                                  |                    |                     |                         |               | 0.1                            |             |                |                      |                          |                            |                 |                    |          |                           |                      |                 |                   |                               | 0.10              | 0.10 |            | 1                               | 1                          |              |                         |           |          |                      |                    |                     |          | 2.00  | 1.00       | 0.04                | 1.00                   |
|                    | HD     | 0.47                      |                 |                         |                   | 1     | 0.05      | 0.77       |                |               |            |                           |                           | 1.82 | 0.77       |               |            |                    |                                  |                    |                     |                         |               | 0.66                           | 0           | 0              | 0                    | 0                        | 0                          | 0               | 0.21               |          |                           |                      |                 |                   |                               | 1.87              | 0.40 |            |                                 |                            | 1            | 1                       |           |          |                      |                    |                     |          | 2.00  | 1.00       | 0.08                |                        |
|                    | AD     | 0.74                      |                 |                         |                   |       |           |            | 1              | 1             |            |                           |                           | 2.00 | 1.00       |               |            |                    |                                  |                    |                     |                         |               |                                |             |                |                      |                          |                            |                 |                    |          | 0                         | 0                    | 0.03            | 0                 | 0                             | 0.03              | 0.06 | 0.02       |                                 |                            |              | 0                       |           |          | 0                    | 0.30               |                     |          | 0.30  | 0.20       | 0.64                |                        |
|                    | HR     | 0.24                      |                 |                         |                   |       |           |            |                |               |            | 1                         | 0                         | 0    | 1.00       | 0.33          | 0          | 0                  | 0                                | 1                  | 1                   | 1                       | 1             |                                |             |                |                      |                          |                            |                 |                    |          |                           |                      |                 |                   |                               |                   | 3.00 | 0.67       |                                 |                            |              |                         |           |          | 0                    | 0                  | 0.00                | 0.00     | 0.24  |            |                     |                        |
| Begou              | MD     | 0.11                      | 0               | 0.4                     | 0.07              |       |           |            |                |               |            |                           |                           | 0.48 | 0.18       |               |            |                    |                                  |                    |                     |                         |               | 0.75                           |             |                |                      |                          |                            |                 |                    |          |                           |                      |                 |                   |                               |                   | 0.08 | 0.08       | 1                               | 0                          | 0            |                         |           |          |                      | 0                  | 0                   | 0.00     | 0.00  | 0.24       |                     |                        |
|                    | HD     | 0.06                      |                 |                         |                   | 1     | 0.07      | 0          |                |               |            |                           |                           | 1.07 | 0.45       |               |            |                    |                                  |                    |                     |                         |               |                                | 0           | 0.26           | 0                    | 0                        | 0                          | 0               | 0                  | 0.5      | 0.30                      |                      |                 |                   |                               |                   | 1.06 | 0.23       |                                 |                            |              | 0                       | 0         |          |                      |                    |                     | 0.00     | 0.00  | 0.04       |                     |                        |
|                    | AD     | 0.55                      |                 |                         |                   |       |           |            | 1              | 0.5           |            |                           |                           | 1.50 | 0.75       |               |            |                    |                                  |                    |                     |                         |               |                                |             |                |                      |                          |                            |                 |                    |          | 0                         | 0                    | 0.76            | 0                 | 0                             | 0.50              | 1.26 | 0.34       |                                 |                            | 0            |                         |           | 0        | 0                    |                    |                     | 0.00     | 0.00  | 0.60       |                     |                        |
|                    | HR     | 0.29                      |                 |                         |                   |       |           |            |                |               |            | 1                         | 0                         | 1    | 2.00       | 1.00          | 0          | 0                  | 0                                | 0                  | 0                   | 0                       | 0             | 1                              |             |                |                      |                          |                            |                 |                    |          |                           |                      |                 |                   |                               |                   | 1.00 | 0.22       |                                 |                            |              |                         |           |          | 0                    | 0                  | 0.00                | 0.00     | 0.35  |            |                     |                        |
| Boukhzama 1        | MD     | 0.68                      | 1               | 0.1                     | 0.06              |       |           |            |                |               |            |                           |                           | 1.13 | 0.42       |               |            |                    |                                  |                    |                     |                         |               | 0.05                           |             |                |                      |                          |                            |                 |                    |          |                           |                      |                 |                   |                               |                   | 0.05 | 0.05       | 1                               | 0                          | 0            |                         |           |          |                      |                    |                     |          | 1.00  | 0.05       | -0.02               | 0.74                   |
|                    | HD     | 0.47                      |                 |                         |                   | 0     | 0.5       | 0.47       |                |               |            |                           |                           | 0.97 | 0.41       |               |            |                    |                                  |                    |                     |                         |               |                                | 0.33        | 0              | 0                    | 0                        | 0                          | 0               | 0                  | 0        | 0                         |                      |                 |                   |                               | 0.33              | 0.07 |            |                                 |                            | 0            | 1                       |           |          |                      |                    | 1.00                | 0.00     | -0.01 |            |                     |                        |
|                    | AD     | 0.87                      |                 |                         |                   |       |           |            | 1              | 0             |            |                           |                           | 1.00 | 0.50       |               |            |                    |                                  |                    |                     |                         |               |                                |             |                |                      |                          |                            |                 |                    |          |                           | 0.50                 | 0               | 0.82              | 0.50                          | 0                 | 0.05 | 1.87       | 0.50                            |                            |              | 0.5                     |           | 1        | 0.5                  |                    |                     | 2.00     | 1.00  | 0          |                     |                        |
|                    | HR     | 0.41                      |                 |                         |                   |       |           |            |                |               |            | 1                         | 1                         | 0    | 3.00       | 1.00          | 1          | 1                  | 0                                | 0                  | 0                   | 0                       | 1             | 1                              |             |                |                      |                          |                            |                 |                    |          |                           |                      |                 |                   |                               |                   | 4.00 | 0.89       |                                 |                            |              |                         |           |          | 0                    | 0                  | 0.00                | 0.00     | 0.77  |            |                     |                        |
| Drougal            | MD     | 0                         | 1               | 0                       | 0.25              |       |           |            |                |               |            |                           |                           | 1.28 | 0.47       |               |            |                    |                                  |                    |                     |                         |               | 0.2                            |             |                |                      |                          |                            |                 |                    |          |                           |                      |                 |                   |                               | 0.20              | 0.20 | 0          | 0                               | 0                          |              |                         |           |          |                      |                    |                     | 0.00     | 0.00  | 0.00       | 0.02                |                        |
|                    | HD     | 0.06                      |                 |                         |                   | 0     | 0         | 0.46       |                |               |            |                           |                           | 0.46 | 0.19       |               |            |                    |                                  |                    |                     |                         |               |                                | 1.00        | 0.01           | 0                    | 0                        | 0                          | 0.66            | 0.3                | 0        |                           |                      |                 |                   |                               | 1.97              | 0.42 |            |                                 |                            |              | 0                       | 0         |          |                      |                    |                     | 0.00     | 0.00  | 0.04       |                     |                        |
|                    | AD     | 0.32                      |                 |                         |                   |       |           |            | 1              | 0             |            |                           |                           | 0.00 | 0.00       |               |            |                    |                                  |                    |                     |                         |               |                                |             |                |                      |                          |                            |                 |                    |          | 1.00                      | 0                    | 0               | 1.00              | 1.00                          | 0.05              | 3.05 | 0.82       |                                 |                            | 0            |                         | 0         | 1        |                      |                    | 1.00                | 0.5      | 0.10  |            |                     |                        |
|                    | HR     | 0.35                      |                 |                         |                   |       |           |            |                |               |            | 1                         | 0                         | 0    | 1.00       | 0.33          | 0          | 1                  | 0                                | 0                  | 0                   | 0                       | 0             | 0                              |             |                |                      |                          |                            |                 |                    |          |                           |                      |                 |                   |                               |                   | 1.00 | 0.22       |                                 |                            |              |                         |           |          | 1                    | 0                  | 1.00                | 1.00     | -0.16 |            |                     |                        |
| Elkenar            | MD     | 0.11                      | 1               | 0.2                     | 0.08              |       |           |            |                |               |            |                           |                           | 1.26 | 0.47       |               |            |                    |                                  |                    |                     |                         |               | 0.08                           |             |                |                      |                          |                            |                 |                    |          |                           |                      |                 |                   |                               | 0.08              | 0.08 | 1          | 1                               | 0                          |              |                         |           |          |                      |                    |                     |          | 2.00  | 1.00       | -0.05               | 0.28                   |
|                    | HD     | 0.13                      |                 |                         |                   | 1     | 0         | 0.15       |                |               |            |                           |                           | 1.15 | 0.49       |               |            |                    |                                  |                    |                     |                         |               |                                | 1.00        | 0.13           | 0                    | 0                        | 0                          | 1.00            | 0                  | 0        |                           |                      |                 |                   |                               | 2.13              | 0.45 |            |                                 |                            |              | 0                       | 0         |          |                      |                    |                     | 0.00     | 0.00  | 0.12       |                     |                        |
|                    | AD     | 0.45                      |                 |                         |                   |       |           |            | 1              | 0             |            |                           |                           | 1.00 | 0.50       |               |            |                    |                                  |                    |                     |                         |               |                                |             |                |                      |                          |                            |                 |                    |          | 0                         | 0                    | 0.55            | 0                 | 0                             | 0                 | 0.55 | 0.15       |                                 |                            |              | 0                       | 0         |          |                      | 0.00               | 0.00                | 0.29     |       |            |                     |                        |
|                    | HR     | 0.18                      |                 |                         |                   |       |           |            |                |               |            | 1                         | 0                         | 0    | 1.00       | 0.33          | 0          | 0                  | 1                                | 0                  | 0                   | 0                       | 0             | 0                              |             |                |                      |                          |                            |                 |                    |          |                           |                      |                 |                   |                               | 1.00              | 0.22 |            |                                 |                            |              |                         |           |          |                      | 1                  | 0                   | 1.00     | 1.00  | -0.08      |                     |                        |
| Gnebett Ehel Heiba | MD     | 0                         | 0               | 0.1                     | 0.25              |       |           |            |                |               |            |                           |                           | 0.34 | 0.13       |               |            |                    |                                  |                    |                     |                         |               | 0.1                            |             |                |                      |                          |                            |                 |                    |          |                           |                      |                 |                   |                               | 0.10              | 0.10 | 0          | 0                               | 0                          |              |                         |           |          |                      |                    |                     |          | 0.00  | 0.00       | 0.00                | 0.36                   |
|                    | HD     | 0.09                      |                 |                         |                   | 0     | 0         | 0.23       |                |               |            |                           |                           | 0.23 | 0.10       |               |            |                    |                                  |                    |                     |                         |               | 1.00                           | 0.77        | 0              | 0                    | 0                        | 1.00                       | 0               | 0                  |          |                           |                      |                 |                   |                               | 2.77              | 0.59 |            |                                 |                            | 0            | 0                       |           |          |                      |                    | 0.00                | 0.00     | 0.06  |            |                     |                        |
|                    | AD     | 0.32                      |                 |                         |                   |       |           |            | 1              | 0             |            |                           |                           | 1.00 | 0.50       |               |            |                    |                                  |                    |                     |                         |               |                                |             |                |                      |                          |                            |                 |                    |          | 0                         | 0                    | 0.15            | 0                 | 1.00                          | 0.50              | 1.65 | 0.44       |                                 |                            | 0            |                         | 0         | 0        |                      |                    | 0.00                | 0.00     | 0.30  |            |                     |                        |
|                    | HR     | 0.35                      |                 |                         |                   |       |           |            |                |               |            | 1                         | 0                         | 0    | 1.00       | 0.33          | 0          | 1                  | 0                                | 0.5                | 0.5                 | 1                       | 0             | 0                              |             |                |                      |                          |                            |                 |                    |          |                           |                      |                 |                   |                               | 3.00              | 0.67 |            |                                 |                            |              |                         |           |          | 1                    | 0                  | 1.00                | 1.00     | 0.00  |            |                     |                        |
| Goubya Elmesjid    | MD     | 0.03                      | 1               | 0                       | 0.03              |       |           |            |                |               |            |                           |                           | 1.07 | 0.39       |               |            |                    |                                  |                    |                     |                         |               | 0.08                           |             |                |                      |                          |                            |                 |                    |          |                           |                      |                 |                   |                               | 0.08              | 0.08 | 0          | 1                               | 0                          |              |                         |           |          |                      |                    |                     | 1.00     | 0.50  | 0.00       | 0.14                |                        |
|                    | HD     | 0.09                      |                 |                         |                   | 1     | 0.25      | 0.91       |                |               |            |                           |                           | 2.16 | 0.91       |               |            |                    |                                  |                    |                     |                         |               | 0.66                           | 0           | 1.00           | 0                    | 0                        | 0.5                        | 0.3             | 0.45               |          |                           |                      |                 |                   |                               | 2.91              | 0.62 |            |                                 |                            | 0            | 0                       |           |          |                      |                    | 0.00                | 0.00     | 0.08  |            |                     |                        |
|                    | AD     | 0.34                      |                 |                         |                   |       |           |            | 0.5            | 0             |            |                           |                           | 0.50 | 0.25       |               |            |                    |                                  |                    |                     |                         |               |                                |             |                |                      |                          |                            |                 |                    |          | 1.00                      | 0                    | 0.73            | 0                 | 1.00                          | 1.00              | 3.73 | 1.00       |                                 |                            | 1            |                         | 0         | 1        |                      |                    | 2.00                | 1.00     | 0.09  |            |                     |                        |
|                    | HR     | 0.24                      |                 |                         |                   |       |           |            |                |               |            | 1                         | 0                         | 0    | 1.00       | 0.33          | 0          | 0                  | 0                                | 0.5                | 0.5                 | 0.5                     | 0             | 0                              |             |                |                      |                          |                            |                 |                    |          |                           |                      |                 |                   |                               | 1.50              | 0.33 |            |                                 |                            |              |                         |           | 1        | 0                    | 1.00               | 1.00                | -0.12    |       |            |                     |                        |
