# Supplementary material
Source: MDPI journal article supplement (https://www.mdpi.com/2071-1050/11/18/5063)
Supplement: s1 [file s1]

## Supplementary file 2 – Survey questionnaire

Multi-hazard risk assessment at community level integrating local and scientific knowledge in the Hodh Chargui, Mauritania

Maurizio Tiepolo, Maurizio Bacci, Sarah Braccio, Stefano Bechis

*Sustainability* - Open Access Journal MDPI

| Risk determinant  | Indicator<br>(Ref. to column at<br>Supplementary file 1) | Question                                                                                                     | Answers (Score)                                                                                                                            |
|-------------------|----------------------------------------------------------|--------------------------------------------------------------------------------------------------------------|--------------------------------------------------------------------------------------------------------------------------------------------|
| Exposure          | 3                                                        | What are the crops grown?                                                                                    | Rain-fed millet, sorghum, cowpeas (0). Vegetables (1).                                                                                     |
|                   | 4                                                        | How much livestock is present at the village during the dry season?                                          | Dromedaries, horses, cattle, donkeys, sheep, goats.                                                                                        |
|                   | 5                                                        | How many boreholes and modern /traditional boreholes are there?                                              |                                                                                                                                            |
|                   | 6                                                        | Are there ponds on the territory of the community?                                                           | Yes (1), No (0).                                                                                                                           |
|                   | 7                                                        | How many earth dams are present in the community territory?                                                  |                                                                                                                                            |
|                   | 8                                                        | How many are the inhabitants of the community?<br>How much population has arrived and left in the last year? | Actual.<br>Arrivals (including births), departures.                                                                                        |
|                   | 9                                                        | What are the types of soils in order of importance?                                                          | 1 Dune, 2 Sandy soils, 3 Rocky areas, 4 Clayey soils, 5 Mixed soils (1 + 3 = 1).                                                           |
|                   | 10                                                       | Are the fields fenced?                                                                                       | No (1). Yes, with barbed wire, Y with thorny branches (0).                                                                                 |
|                   | 11                                                       | How many earth embankments are there in the community territory?                                             |                                                                                                                                            |
|                   | 12                                                       | How many houses are in the flood zone?                                                                       |                                                                                                                                            |
|                   | 13                                                       | How many wells are found in the flood zone                                                                   |                                                                                                                                            |
| Vulnerability     | 16                                                       | Does the community receive the telephone signal?                                                             | Y (0). N (1).                                                                                                                              |
|                   | 17                                                       | Do members of the community use mobile phones?                                                               | Y (0). N (1).                                                                                                                              |
|                   | 18                                                       | Does the community have earth embankments?                                                                   | Y (1). N (0).                                                                                                                              |
|                   | 19                                                       | How many earth embankments do not have a spillway / lock?                                                    | 1 (0.5). > 1 (1).                                                                                                                          |
|                   | 20                                                       | How many earth embankments are damaged and lose water?                                                       | 1 (0.5). > 1 (1).                                                                                                                          |
|                   | 21                                                       | Are earth embankments protected with barbed wire against animal transit?                                     | All (0). Some (0.5). None (0).                                                                                                             |
|                   | 22                                                       | Are river banks protected with gabion walls?                                                                 | All (0). None (1).                                                                                                                         |
|                   | 23                                                       | How many wells are flooded in the wet season?                                                                | One or more (1). None (0).                                                                                                                 |
|                   | 24                                                       | How many km is the nearest pasture in the dry season?<br>and in the wet season?                              | ≥ 200 km (1). 8 km (0).                                                                                                                    |
|                   | 25                                                       | How many solar power plants are there?                                                                       | 5 (0). 1 (0.33), 0 (0).                                                                                                                    |
|                   | 26                                                       | What is the distance of the nearest well in the dry season?                                                  | 3.1 km (1). 0 km (0).                                                                                                                      |
|                   | 27                                                       | Is the borehole equipped with a pump, water tank and tap?                                                    | Yes (0). No (1).                                                                                                                           |
|                   | 28                                                       | Does the borehole motor work or is it dead?                                                                  | It works (0). It is broken (1).                                                                                                            |
|                   | 29                                                       | Does the fountain offer a regular service?                                                                   | Yes (0). No (1).                                                                                                                           |
|                   | 30                                                       | What is the water flow of the well?                                                                          | Dry well (0). > 24h to recharge (0.75). 6 -24h to recharge (0.66). 3-6h to recharge (0.5). 1h to recharge (0.3). Water always present (1). |
|                   | 31                                                       | What is the quality of water at the end of the dry season?                                                   | Good (0). A little salty (0.5). Very salty (0.66). Unusable (1).                                                                           |
|                   | 33                                                       | How does access to water happen for gardening?                                                               | Faucet (1). Water transport from a well far away from a cart with animal traction (1).                                                     |
|                   | 34                                                       | Is gardening practiced?                                                                                      | Y (1). N (0).                                                                                                                              |
|                   | 35                                                       | How many kilometers is the market located?                                                                   | 33 km (1), 0 km (0).                                                                                                                       |
|                   | 36                                                       | How many fields are fenced with barbed wire?                                                                 | All (0). Most (0.5). Minor part (0).                                                                                                       |
| Adaptive capacity | 37                                                       | What is the destination of the crop in order of importance?                                                  | Nema Market (0). Local market (0). Self-consumption only (1).                                                                              |
|                   | 38                                                       | How many days does the interruption of the track last in the wet season?                                     | 60 days (1). There are no interruptions (0).                                                                                               |
|                   | 41                                                       | Do small holder farmers and herders listen to radio programs directed at them?                               | Y (1). N (0).                                                                                                                              |
|                   | 42                                                       | Do herders benefit from extension services?                                                                  | Y (1). N (0.5).                                                                                                                            |
|                   | 43                                                       | Does the community practice fodder storage?                                                                  | Y (1). N (0).                                                                                                                              |
|                   | 44                                                       | Do farmers / horticulturists benefit from extension services?                                                | Y (1). Occasionally (0.5). N (0).                                                                                                          |
|                   | 45                                                       | Is access to water through fountains?                                                                        | Y (1). N (0).                                                                                                                              |
|                   | 46                                                       | Does the community have a borehole?                                                                          | Y (1). N (0).                                                                                                                              |
|                   | 47                                                       | How many wells have solar pumps?                                                                             | ≥ 1 (1). 0 (0).                                                                                                                            |
|                   | 48                                                       | How many are the existing agricultural cooperatives?                                                         | ≥ 3 (1). 2 (0.5). 1 (0.3). 0 (0).                                                                                                          |
|                   | 49                                                       | How many farmers listen to the radio?                                                                        | Y (1). None (0).                                                                                                                           |
|                   | 50                                                       | How many earth embankments are equipped with spillways?                                                      | ≥ 1 (1). None (0).                                                                                                                         |
